# Supplementary material for: Metabolic landscape of the tumor microenvironment at single cell resolution
Source: PubMed Central journal article supplement (PMC6704063; doi:10.1038/s41467-019-11738-0), 2019-08-21
Supplement: 41467_2019_11738_MOESM5_ESM.pdf [file 41467_2019_11738_MOESM5_ESM.pdf]

**Title:** Supplementary Data 1.

**Description:** Pathway activity scores and related p-values in different cell types”

**Title:** Supplementary Data 2.

**Description:** Complete results of the GSEA analysis for comparison of metabolic gene expression between T cell and fibroblast subtypes.
